# Supplementary material for: The Impact of the COVID-19 Pandemic on the Perception of Health and Treatment-Related Issues among Patients with Phenylketonuria in Poland—The Results of a National Online Survey
Source: MDPI journal article supplement (doi:10.3390/ijerph18126399), 2021-06-13
Supplement: s1 [file s1]

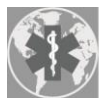

**Supplementary Table 1.** Characteristics of contacts with a PKU specialist doctor and dietitian (N=571).

| Characteristics                                                                                                               | n/N (%)    |
|-------------------------------------------------------------------------------------------------------------------------------|------------|
| Did you use to contact your PKU specialist/dietitian by phone prior to the pandemic?                                          |            |
| Yes, regularly                                                                                                                | 138 (24.2) |
| Yes, several times                                                                                                            | 167 (29.2) |
| Maybe once                                                                                                                    | 56 (9.8)   |
| I do not remember                                                                                                             | 23 (4.0)   |
| I did not feel such a need                                                                                                    | 178 (31.2) |
| There was no such possibility                                                                                                 | 9 (1.6)    |
| Before the pandemic, did you use to contact your PKU specialist/dietitian via Skype, videoconference or through social media? |            |
| Yes, regularly                                                                                                                | 27 (4.7)   |
| Yes, several times                                                                                                            | 31 (5.4)   |
| Maybe once                                                                                                                    | 14 (2.5)   |
| I do not remember                                                                                                             | 25 (4.4)   |
| I did not feel such a need                                                                                                    | 333 (58.3) |
| There was no such possibility                                                                                                 | 141 (24.7) |
| How did you contact your doctor or dietitian during the pandemic?                                                             |            |
| Phone                                                                                                                         | 333 (58.3) |
| Videochat                                                                                                                     | 2 (0.4)    |
| Messenger & WhatsApp                                                                                                          | 16 (2.8)   |
| Facebook                                                                                                                      | 5 (0.9)    |
| Text message                                                                                                                  | 77 (13.5)  |
| E-mail                                                                                                                        | 114 (20.0) |
| I did not feel such a need                                                                                                    | 182 (31.9) |
| There was no such possibility                                                                                                 | 10 (1.8)   |
| Have pandemic restrictions changed the difficulty to communicate with your specialist doctor/dietitian?                       |            |
| Increased considerably                                                                                                        | 23 (4.0)   |
| Increased slightly                                                                                                            | 126 (22.1) |
| Remained similar                                                                                                              | 172 (30.1) |
| Decreased slightly                                                                                                            | 90 (15.8)  |
| Decreased considerably                                                                                                        | 160 (28.0) |
| Number of contacts with a doctor                                                                                              |            |
| Mean (SD)                                                                                                                     | 1.7 ±2.1   |
| Range                                                                                                                         | 0–12       |
| Missing data                                                                                                                  | 5          |

PKU – phenylketonuria, N – number of all respondents, n – number of a given answer, SD – standard deviation,

**Supplementary Table 2.** Respondents' opinions on remote contact in the treatment of PKU (N=571).

| Characteristics                                                                  | n/N (%)    |
|----------------------------------------------------------------------------------|------------|
| Were you satisfied with the remote contact?                                      |            |
| Definitely                                                                       | 199 (34.9) |
| Yes                                                                              | 163 (28.5) |
| I do not know                                                                    | 184 (32.2) |
| No                                                                               | 17 (3.0)   |
| Definitely not                                                                   | 8 (1.4)    |
| Would you like to have remote contact in the future?                             |            |
| Definitely                                                                       | 137 (24.0) |
| Yes                                                                              | 169 (29.6) |
| I do not know                                                                    | 157 (27.5) |
| No                                                                               | 82 (14.4)  |
| Definitely not                                                                   | 26 (4.6)   |
| In the case of PKU, can a remote visit replace direct contact with a specialist? |            |
| Definitely                                                                       | 48 (8.4)   |
| Yes                                                                              | 185 (32.4) |
| I do not know                                                                    | 61 (10.7)  |
| No                                                                               | 196 (34.3) |
| Definitely not                                                                   | 81 (14.2)  |
| In the case of other diseases, can you imagine remote contact with the doctor?   |            |
| Definitely                                                                       | 40 (7.0)   |
| Yes                                                                              | 116 (20.3) |
| I do not know                                                                    | 78 (13.7)  |
| No                                                                               | 245 (42.9) |
| Definitely not                                                                   | 92 (16.1)  |

PKU – phenylketonuria, N – number of all respondents, n – number of a given answer,

**Supplementary Table 3.** Respondents' opinions on access to special food, diet, activities and stress during the pandemic (N=571).

|                                                                                                                                                  |            |
|--------------------------------------------------------------------------------------------------------------------------------------------------|------------|
| What was your access to special low phenylalanine products during the pandemic?                                                                  | n/N (%)    |
| Definitely worse                                                                                                                                 | 34 (6.0)   |
| Worse                                                                                                                                            | 190 (33.3) |
| The same as before the pandemic                                                                                                                  | 342 (59.9) |
| Better                                                                                                                                           | 2 (0.3)    |
| Definitely better                                                                                                                                | 3 (0.5)    |
| What was your access to phenylalanine-free formulas during the pandemic?                                                                         |            |
| Definitely worse                                                                                                                                 | 18 (3.2)   |
| Worse                                                                                                                                            | 100 (17.5) |
| The same as before the pandemic                                                                                                                  | 445 (79.3) |
| Better                                                                                                                                           | 4 (0.7)    |
| Definitely better                                                                                                                                | 4 (0.7)    |
| Was it difficult to stick to the diet during the pandemic?                                                                                       |            |
| Definitely more difficult                                                                                                                        | 9 (1.6)    |
| More difficult                                                                                                                                   | 63 (11.0)  |
| The same as before the pandemic                                                                                                                  | 258 (45.2) |
| Easier                                                                                                                                           | 136 (23.8) |
| Definitely easier                                                                                                                                | 105 (18.4) |
| During the pandemic and its associated mobility restrictions, have there been any other health problems that may have affected your Phe results? |            |
| Definitely                                                                                                                                       | 28 (4.9)   |
| Yes                                                                                                                                              | 22 (3.9)   |
| I do not know                                                                                                                                    | 30 (5.2)   |
| No                                                                                                                                               | 164 (28.7) |
| Definitely not                                                                                                                                   | 327 (57.3) |
| What was the intensity of stress* in the patient's family in connection with the pandemic?                                                       |            |
| 1                                                                                                                                                | 88 (15.4)  |
| 2                                                                                                                                                | 36 (6.3)   |
| 3                                                                                                                                                | 52 (9.1)   |
| 4                                                                                                                                                | 52 (9.1)   |
| 5                                                                                                                                                | 85 (14.9)  |
| 6                                                                                                                                                | 43 (7.5)   |
| 7                                                                                                                                                | 72 (12.6)  |
| 8                                                                                                                                                | 67 (11.7)  |
| 9                                                                                                                                                | 35 (6.1)   |
| 10                                                                                                                                               | 41 (7.2)   |
| During the pandemic, have you contacted other PKU patients, their parents or caregivers more often than before for information about the diet?   |            |
| Yes                                                                                                                                              | 493 (86.3) |
| No                                                                                                                                               | 78 (13.7)  |
| Frequency of PKU patient's outdoor activities/walks/play between 13 March and 30 April                                                           |            |
| Increased considerably                                                                                                                           | 18 (3.2)   |
| Increased slightly                                                                                                                               | 44 (7.7)   |
| Remained similar                                                                                                                                 | 207 (36.2) |
| Decreased slightly                                                                                                                               | 176 (30.8) |
| Decreased considerably                                                                                                                           | 126 (22.1) |
| Under what circumstances did a person with PKU leave home between 13 March and 30 April?                                                         |            |
| Did not leave home at all                                                                                                                        | 49 (8.6)   |
| Walks with a dog                                                                                                                                 | 162 (28.4) |
| Necessary household duties                                                                                                                       | 173 (30.3) |
| Grocery shopping                                                                                                                                 | 134 (23.5) |
| Shopping in a pharmacy                                                                                                                           | 78 (13.7)  |
| Going out to work                                                                                                                                | 61 (10.7)  |
| Visits to a doctor                                                                                                                               | 35 (6.1)   |
| Gardening                                                                                                                                        | 169 (29.6) |
| Sports                                                                                                                                           | 137 (24.0) |

N – number of all respondents, n – number of a given answer, PKU – phenylketonuria,

\*1 being low and 10 high stress
